# Supplementary material for: Anti-Complementary Components of Helicteres angustifolia
Source: MDPI journal article supplement (doi:10.3390/molecules21111506), 2016-11-10
Supplement: s1 [file s1]

# Supplementary Materials: Anti-Complementary Components of *Helicteres angustifolia*

Xiang Yin, Yan Lu, Zhi-Hong Cheng and Dao-Feng Chen

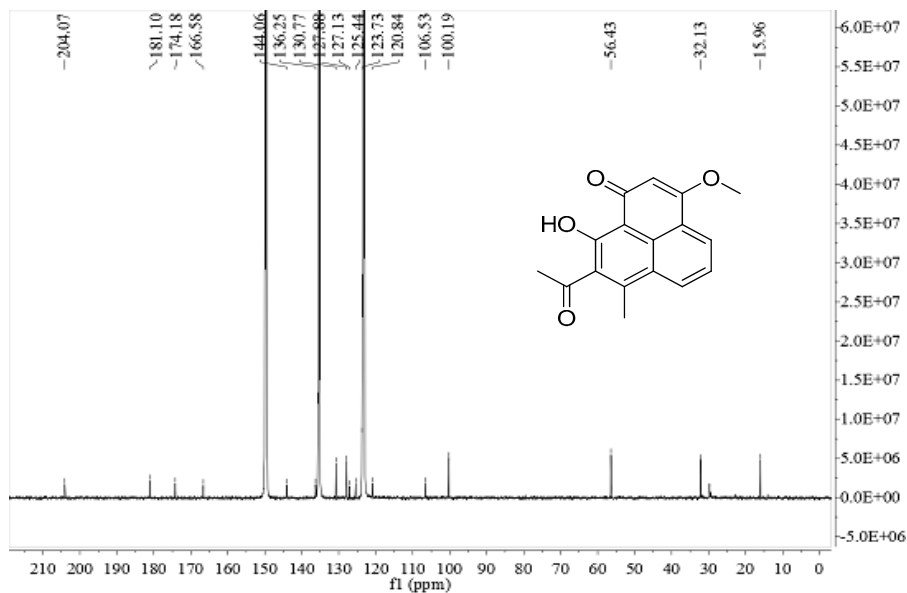

Figure S1. <sup>13</sup>C-NMR spectrum of compound 1 in C<sub>5</sub>D<sub>5</sub>N.

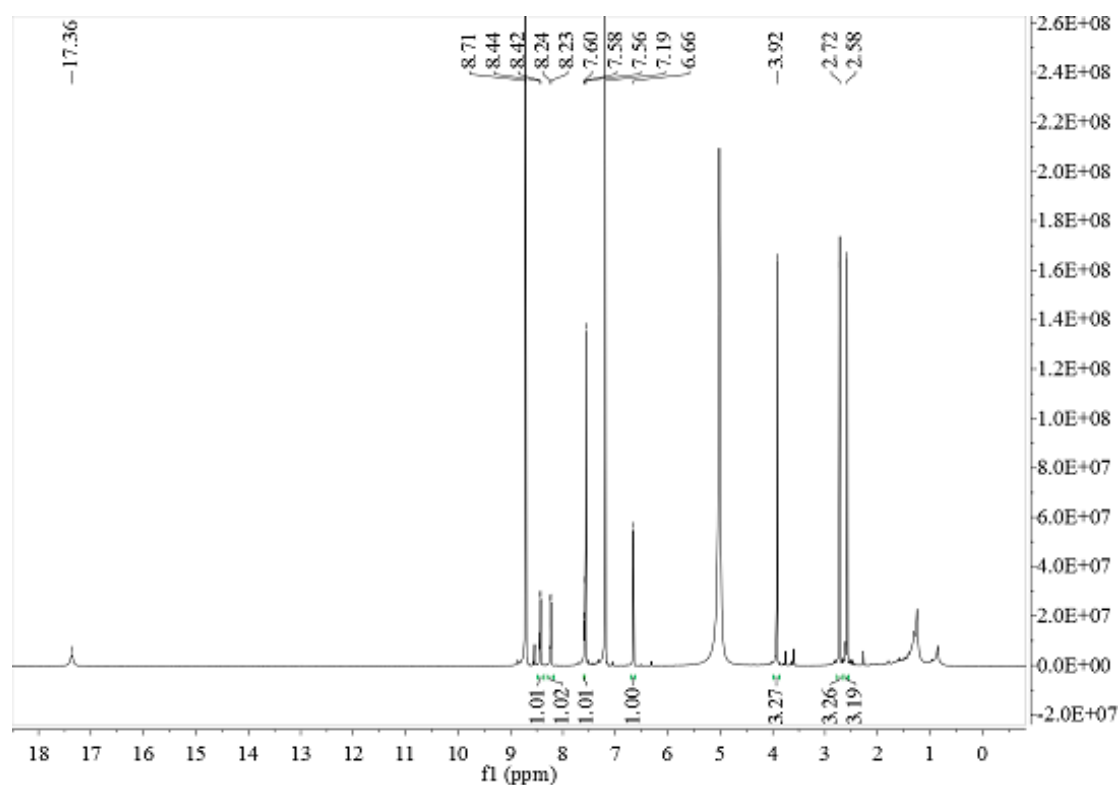

Figure S2. <sup>1</sup>H-NMR spectrum of compound 1 in C<sub>5</sub>D<sub>5</sub>N.

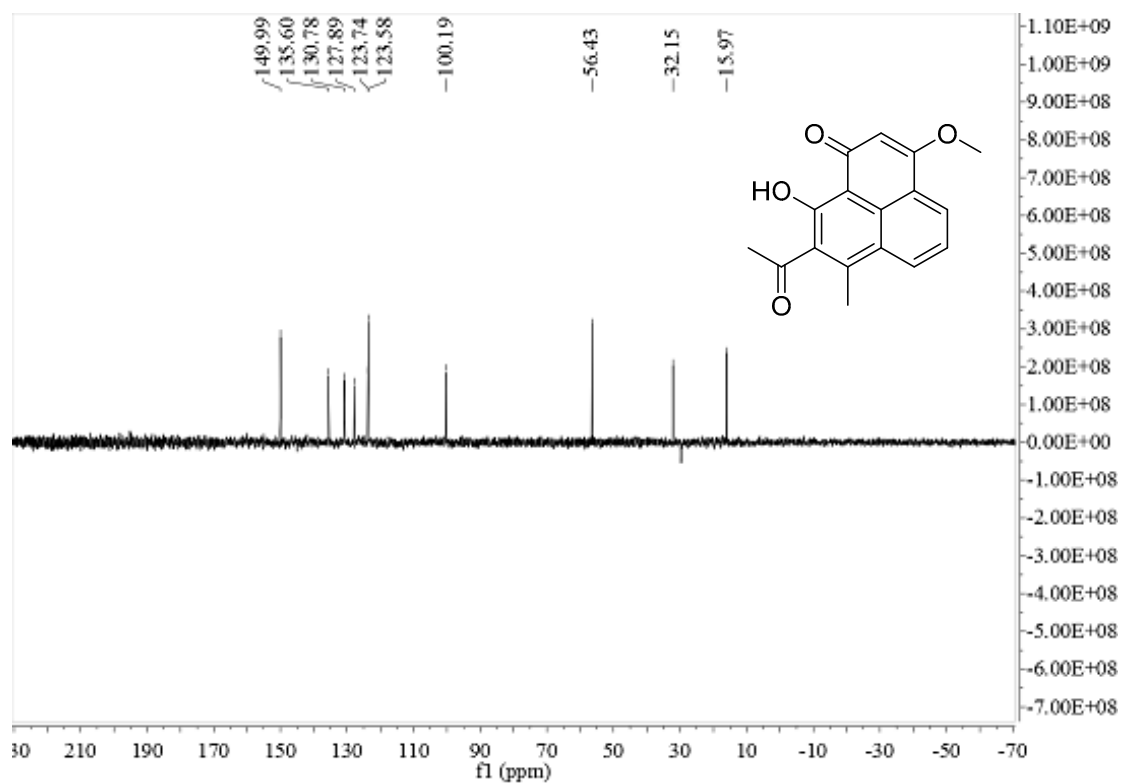

Figure S3. DEPT (135°) spectrum of compound 1 in C<sub>5</sub>D<sub>5</sub>N.

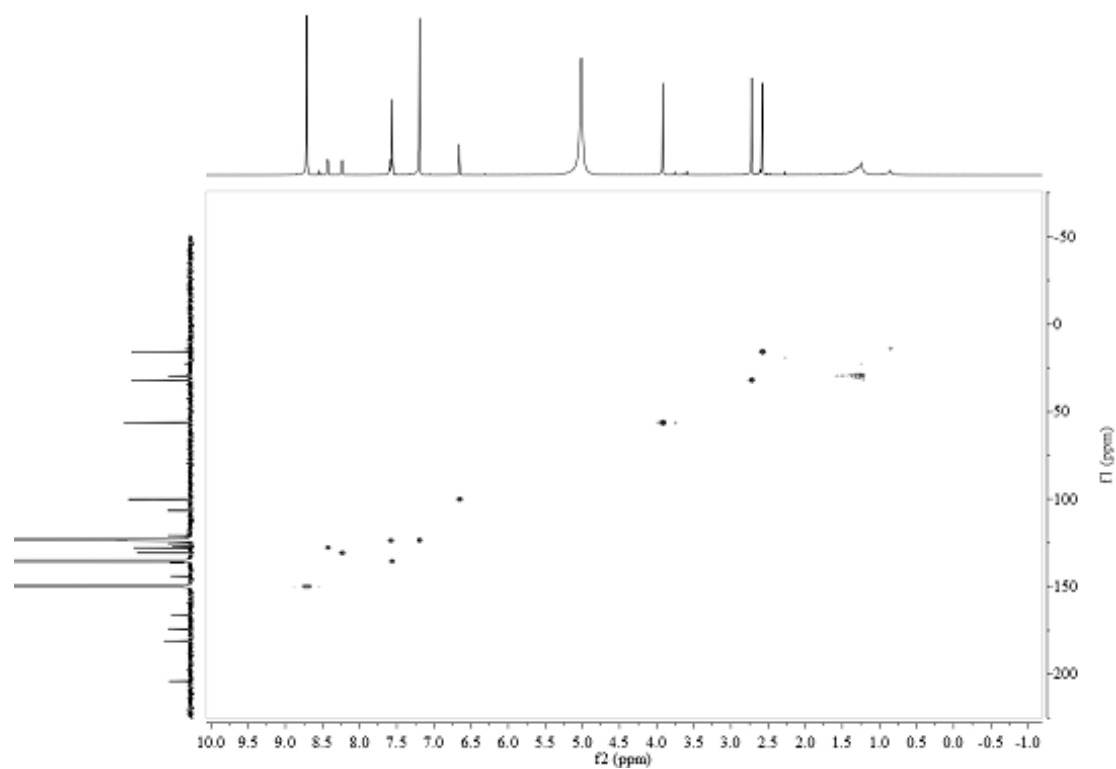

Figure S4. HSQC spectrum of compound 1 in C<sub>5</sub>D<sub>5</sub>N.

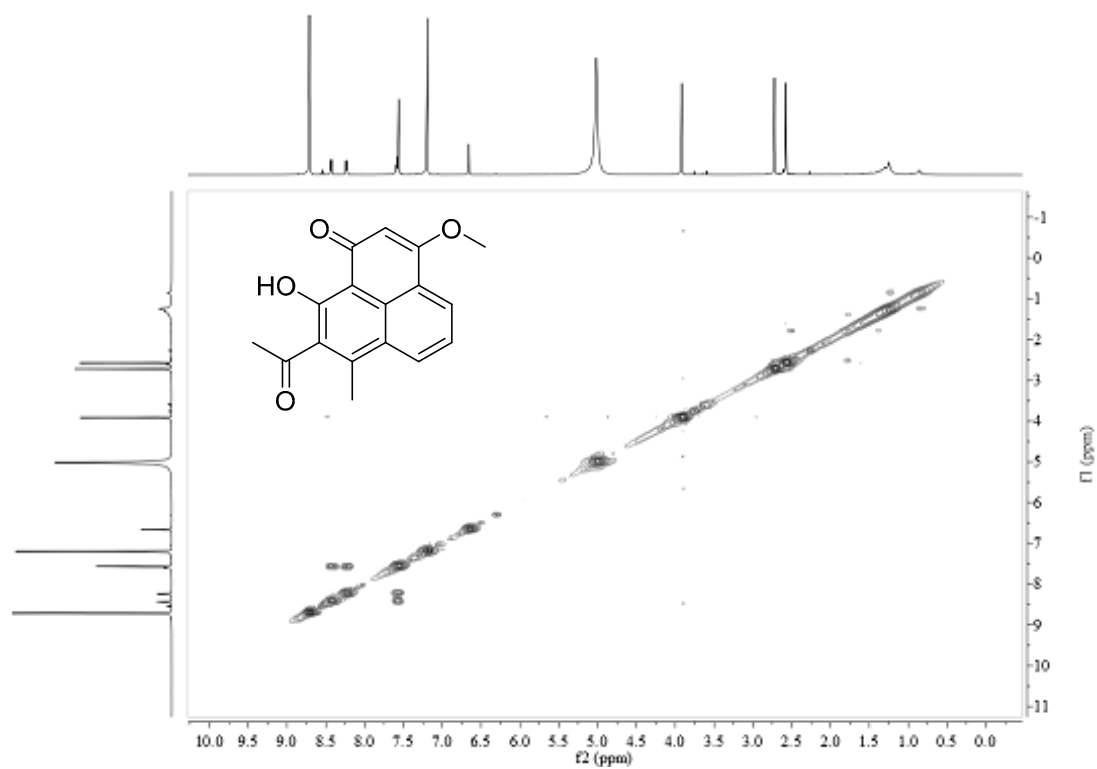Figure S5.  $^1\text{H}$ - $^1\text{H}$  COSY spectrum of compound 1 in  $\text{C}_5\text{D}_5\text{N}$ .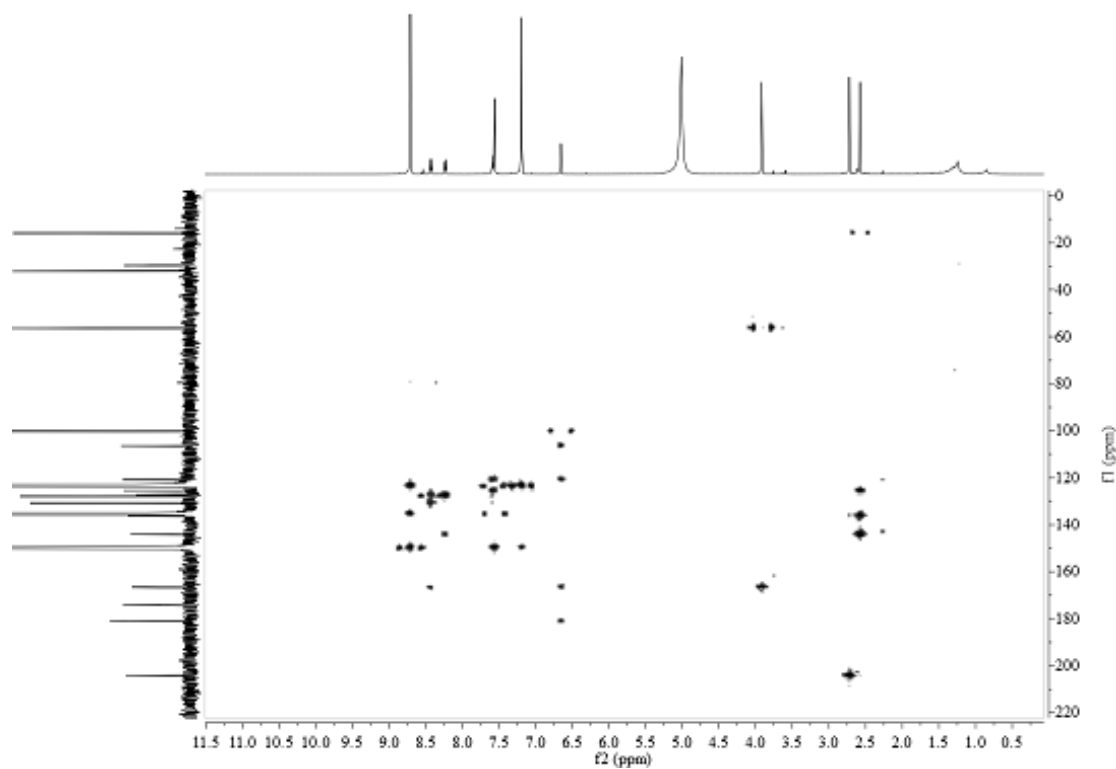Figure S6. HMBC spectrum of compound 1 in  $\text{C}_5\text{D}_5\text{N}$ .

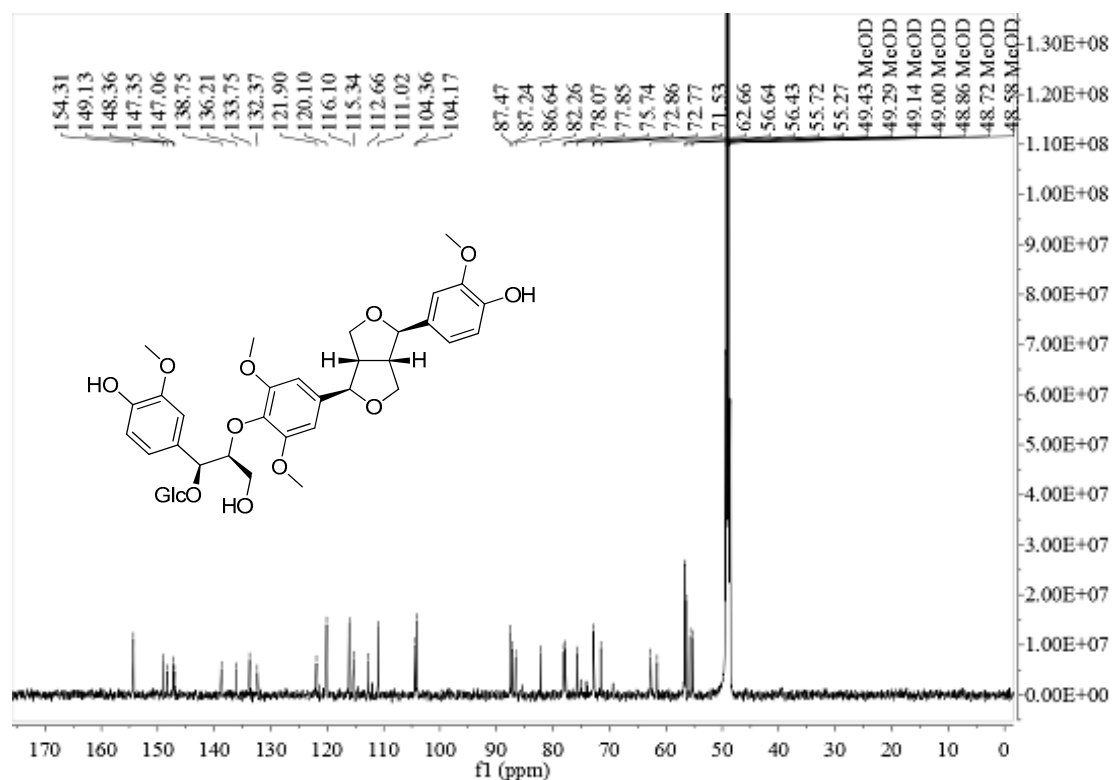Figure S7. <sup>13</sup>C-NMR spectrum of compound 2 in CD<sub>3</sub>OD.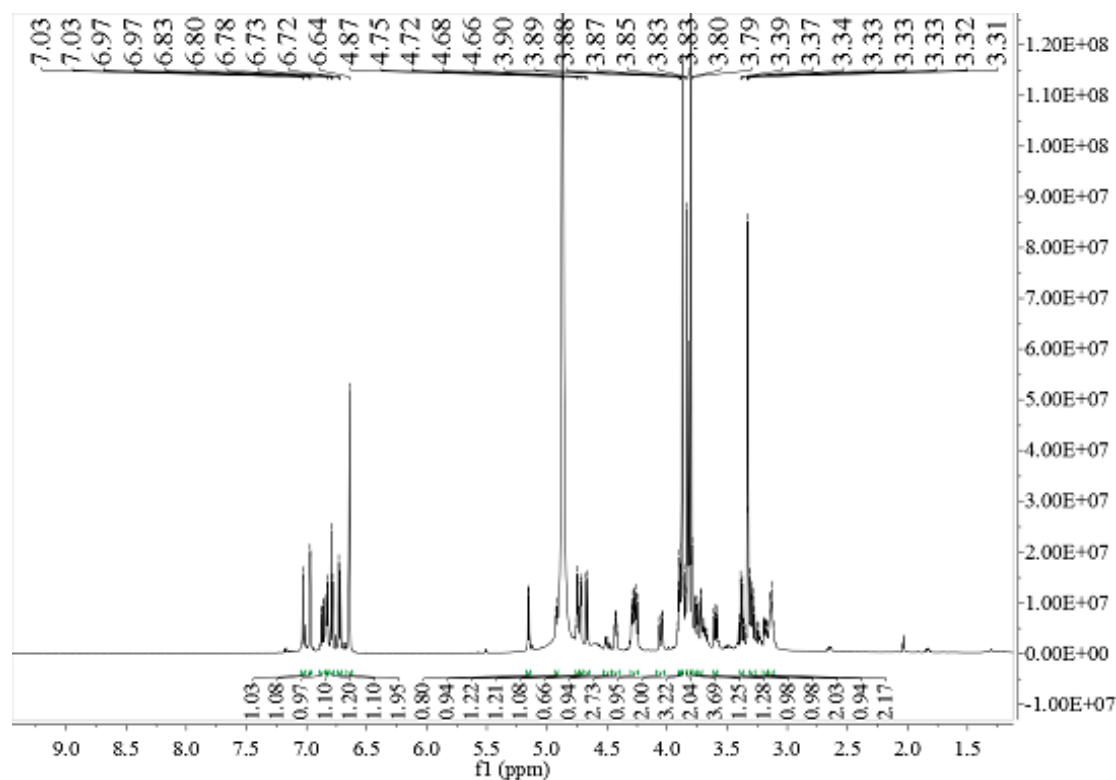Figure S8. <sup>1</sup>H-NMR spectrum of compound 2 in CD<sub>3</sub>OD.

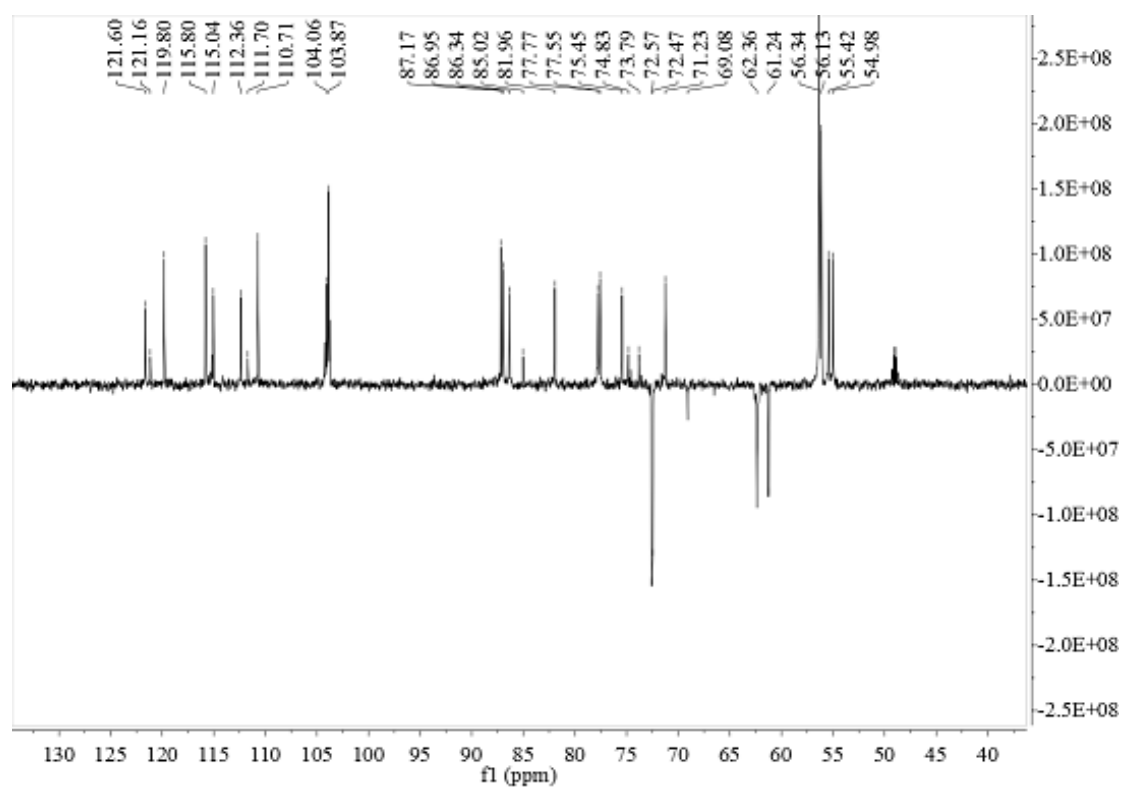

Figure S9. DEPT (135°) spectrum of compound 2 in CD<sub>3</sub>OD.

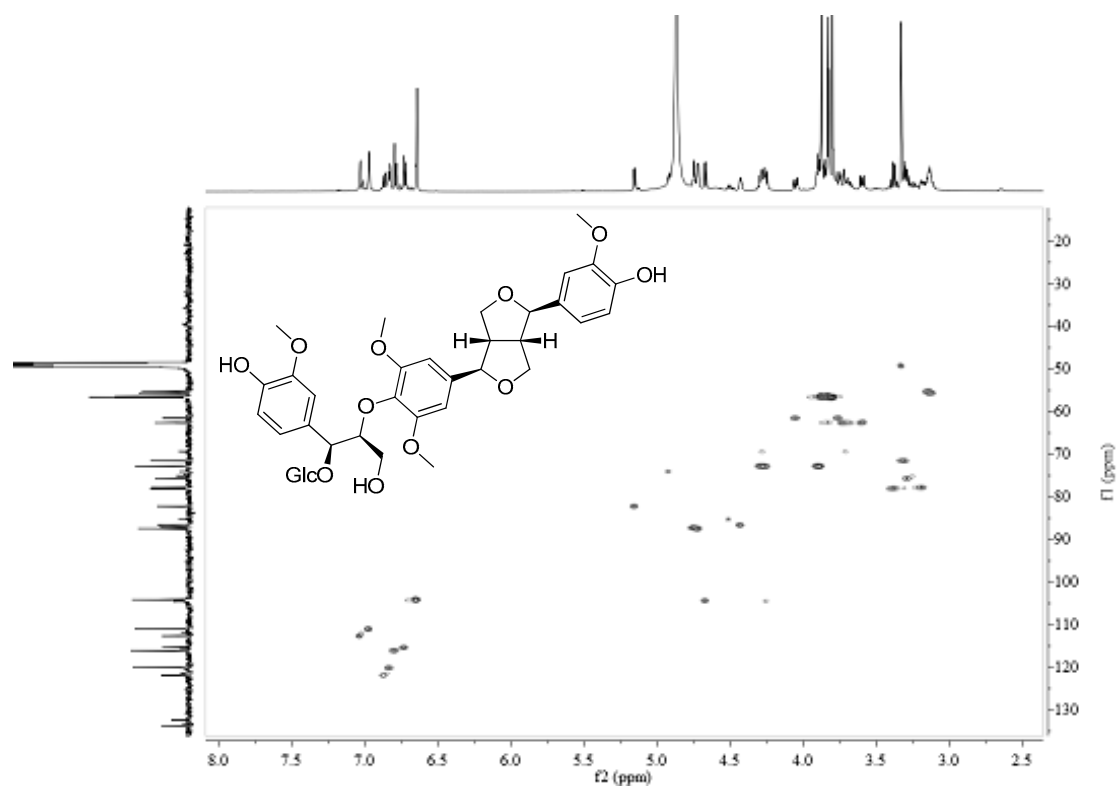

Figure S10. HSQC spectrum of compound 2 in CD<sub>3</sub>OD.

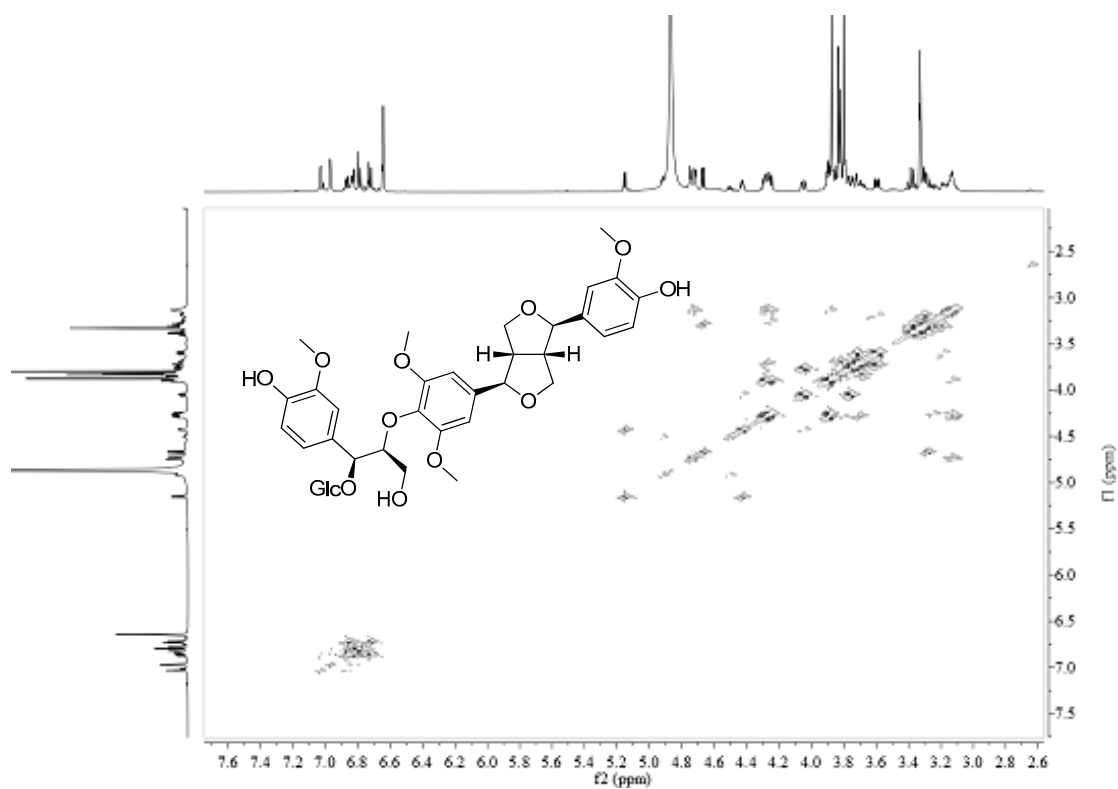

**Figure S11.** <sup>1</sup>H-<sup>1</sup>H COSY spectrum of compound 2 in CD<sub>3</sub>OD.

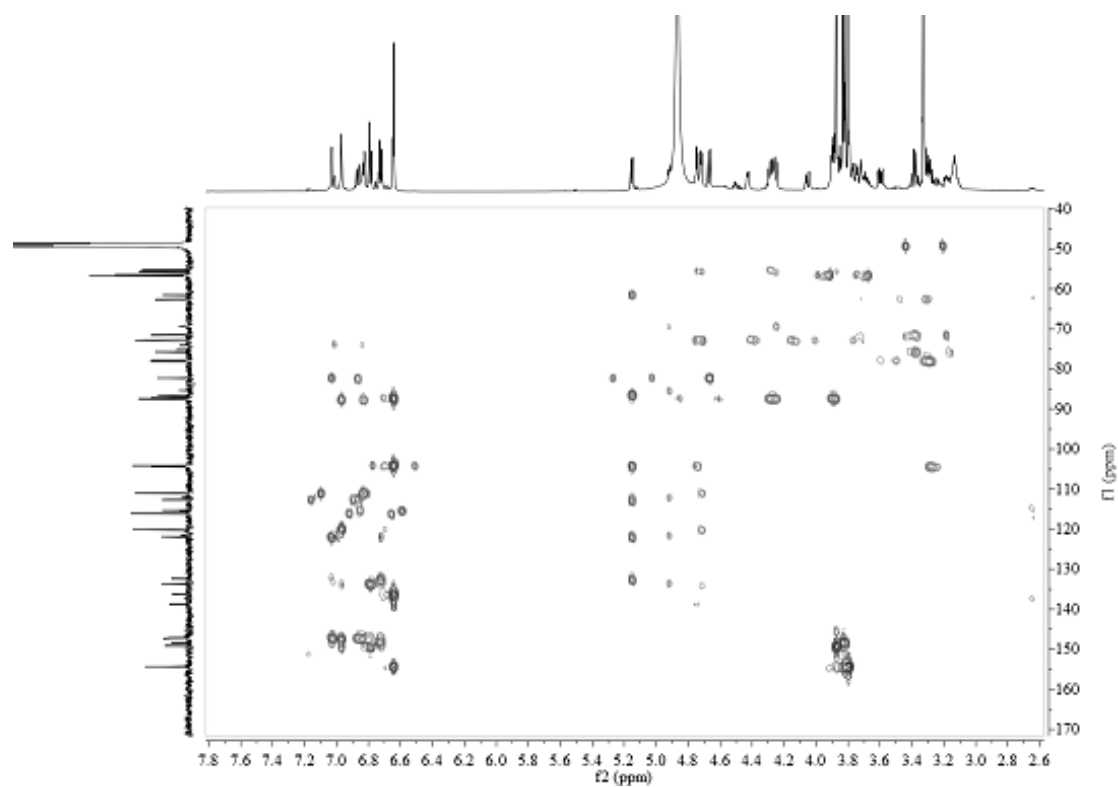

**Figure S12.** HMBC spectrum of compound 2 in CD<sub>3</sub>OD.

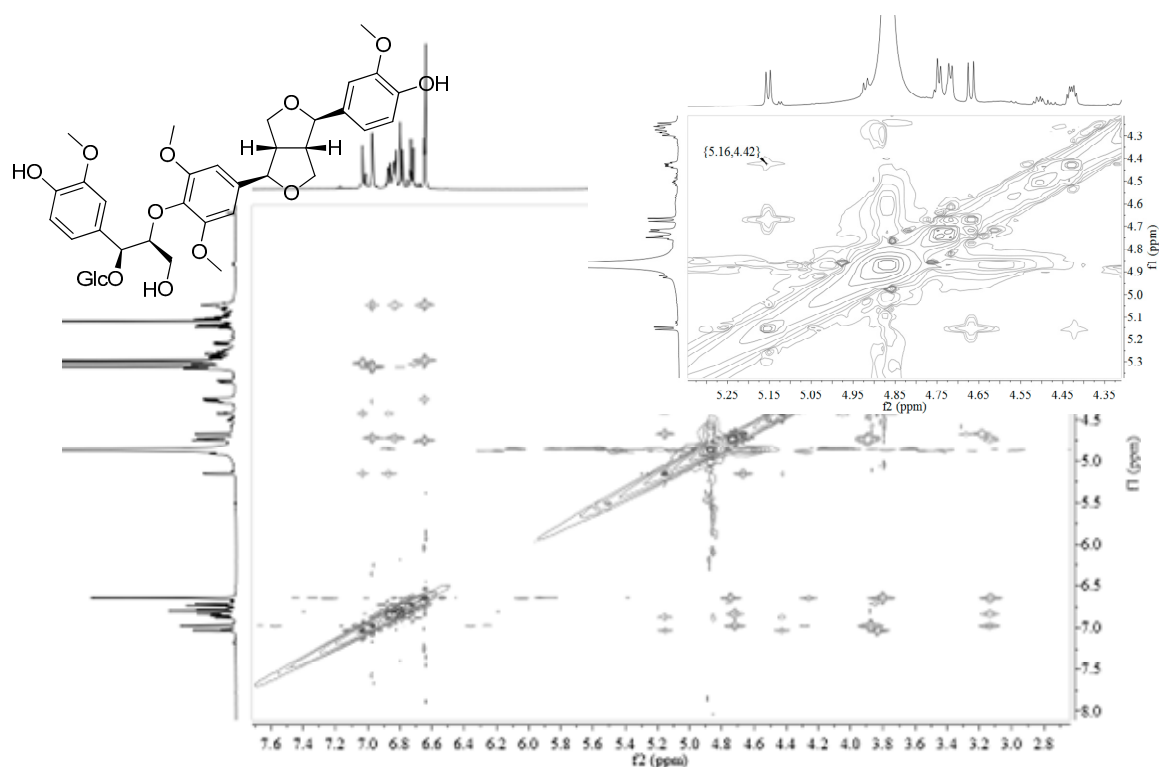Figure S13. NOESY spectrum of compound 2 in CD<sub>3</sub>OD.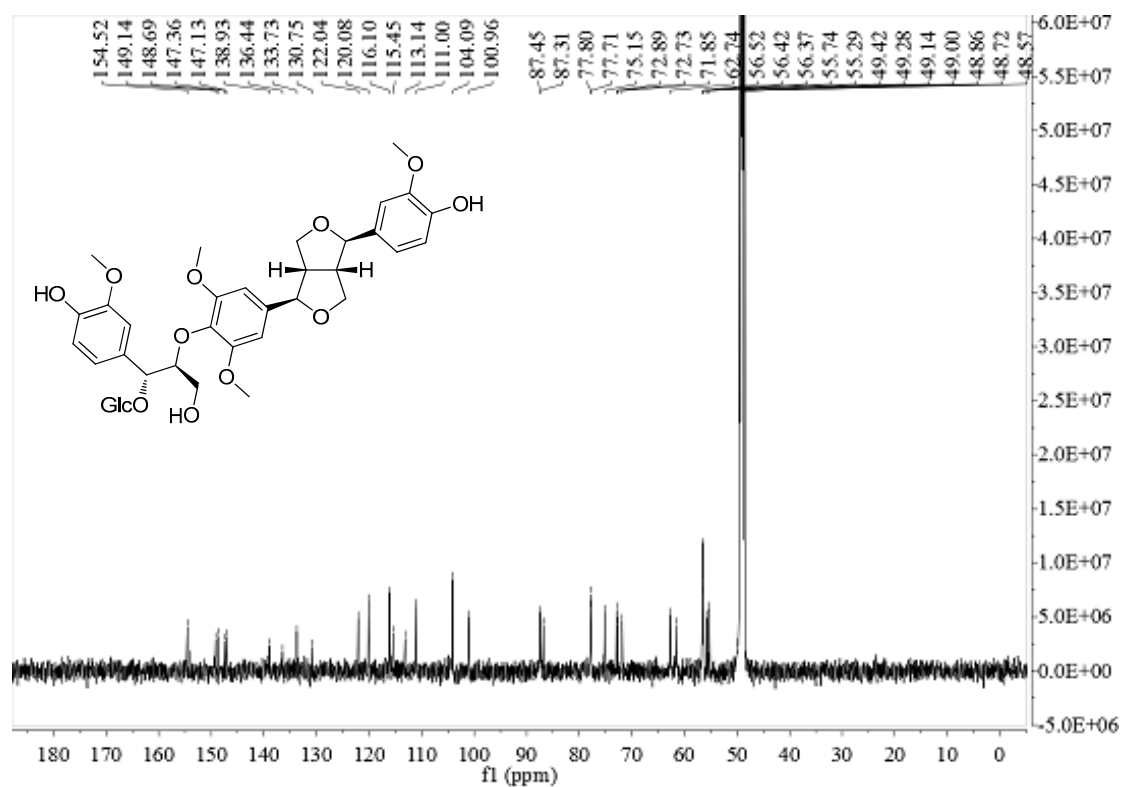Figure S14. <sup>13</sup>C-NMR spectrum of compound 3 in CD<sub>3</sub>OD.

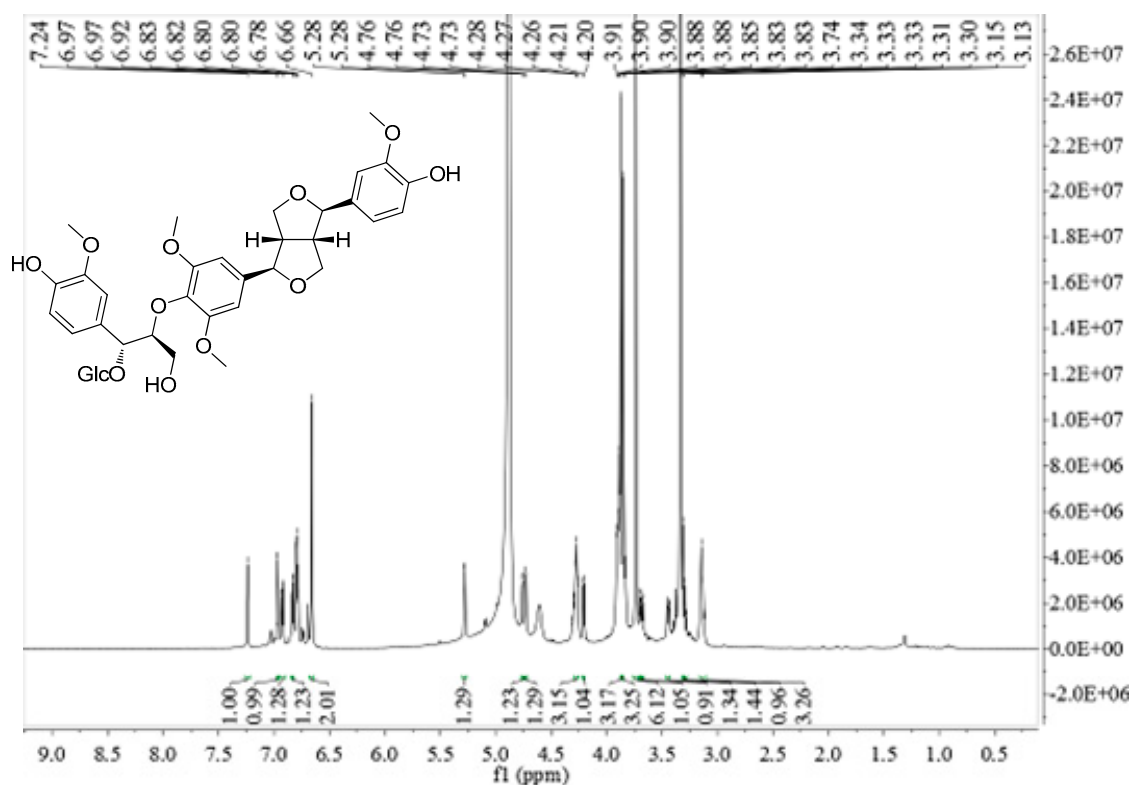Figure S15.  $^1\text{H}$ -NMR spectrum of compound 3 in  $\text{CD}_3\text{OD}$ .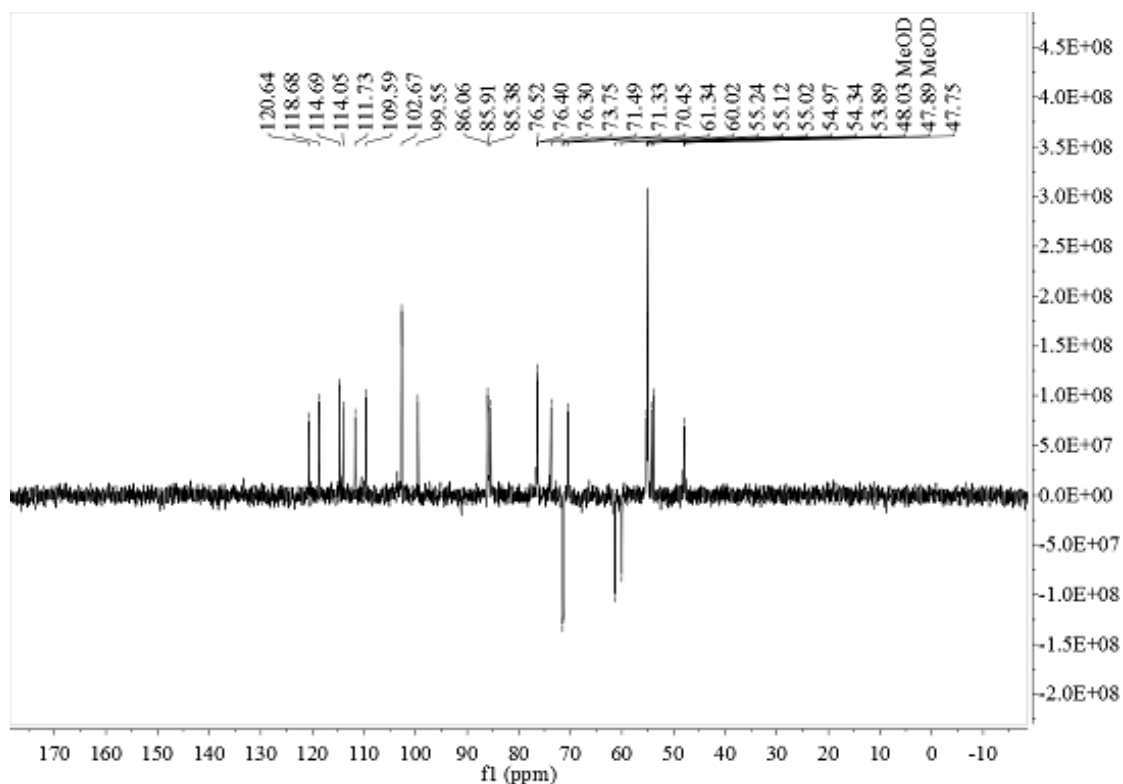Figure S16. DEPT ( $135^\circ$ ) spectrum of compound 3 in  $\text{CD}_3\text{OD}$ .



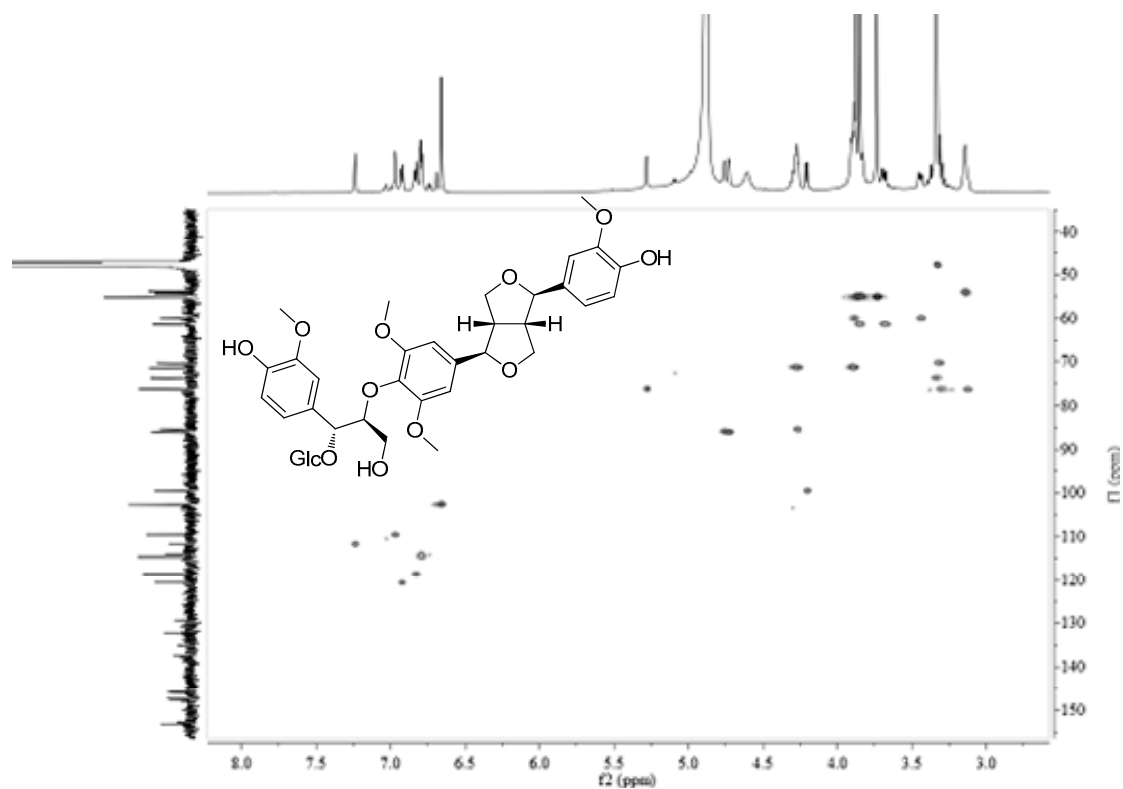

Figure S17. HSQC spectrum of compound 3 in CD<sub>3</sub>OD.

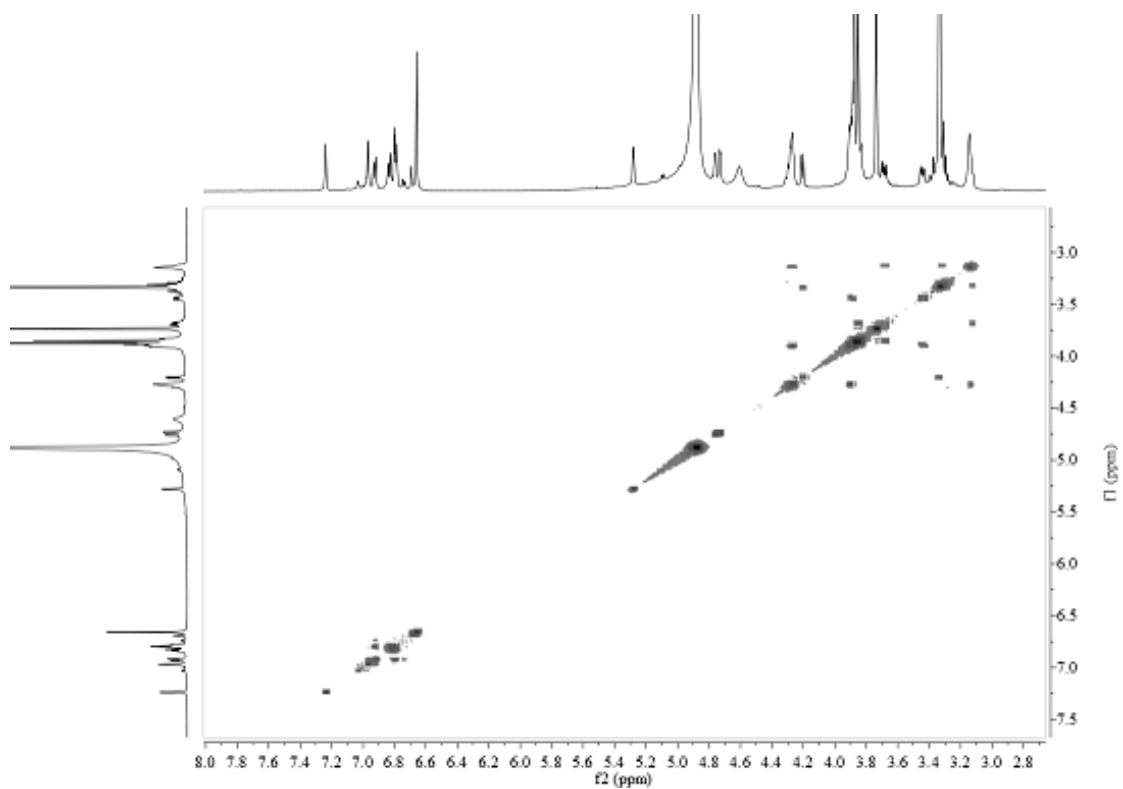

Figure 18S. <sup>1</sup>H-<sup>1</sup>H COSY spectrum of compound 3 in CD<sub>3</sub>OD.

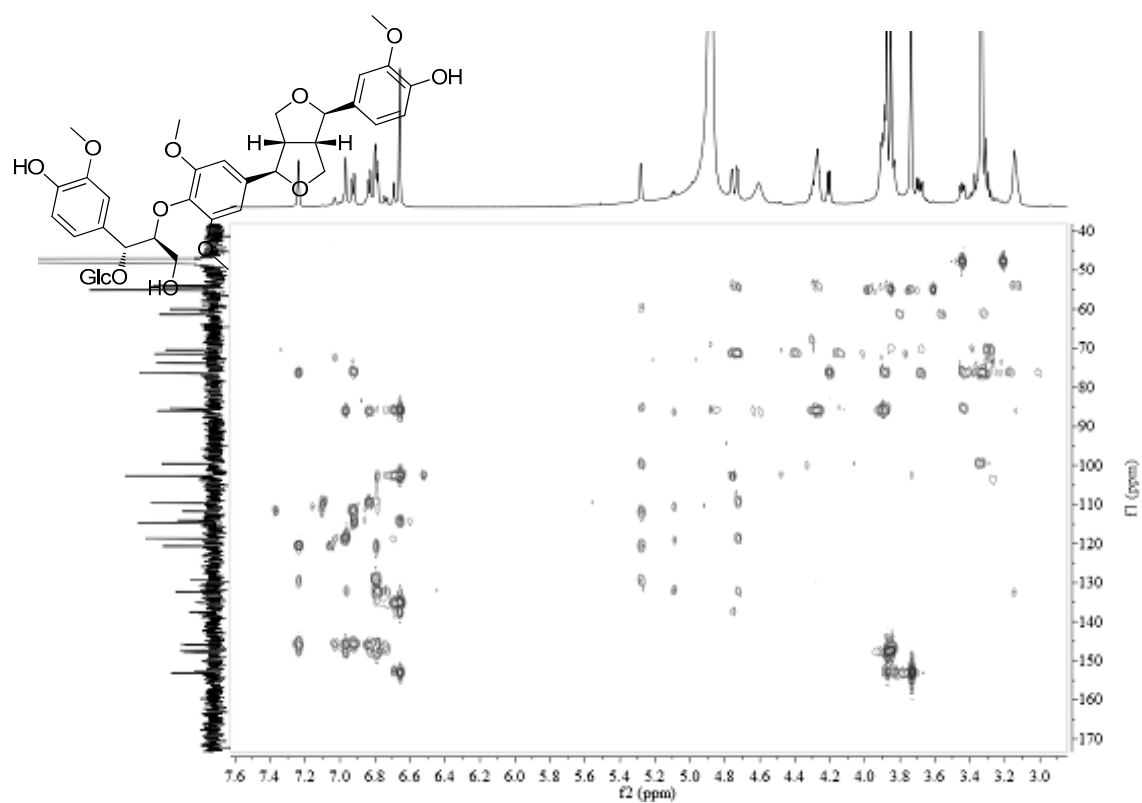

Figure S19. HMBC spectrum of compound 3 in  $\text{CD}_3\text{OD}$ .

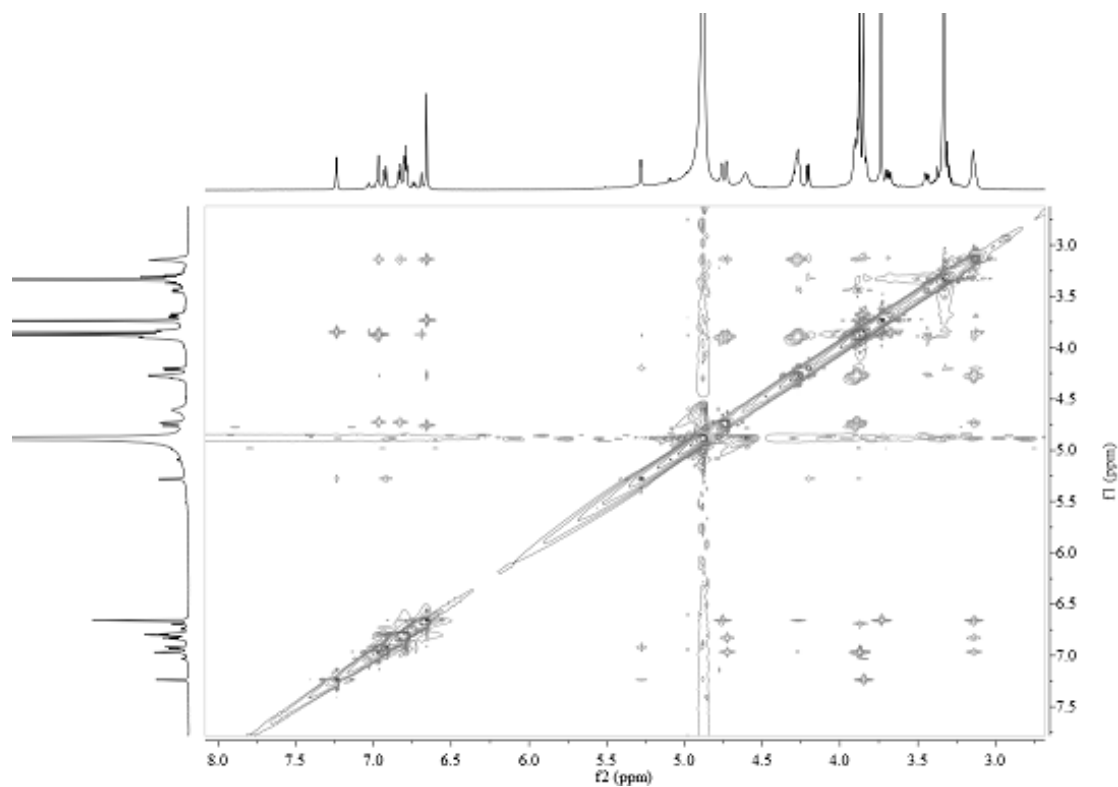

Figure S20. NOESY spectrum of compound 3 in  $\text{CD}_3\text{OD}$ .
